# Supplementary material
Source: publisher figshare collection journal article supplement (https://scielo.figshare.com/articles/dataset/_/6503222)
Supplement: Supplementary file 1 [file Table_1.xls]

## Sheet: Table_1
<b>Baseline Characteristics</b>	<b></b>
Age (years)	56.8 ± 12.5
Gender, male	32(53.3)
BMI (kg/m2)	24.6 ± 3.1
AF type, paroxysmal AF	58 (96.7)
AF duration (months)	25.5 (12, 69)
CHA<sub>2</sub>DS<sub>2</sub>-VASc score	1(0, 2)
LAD (mm)	35.2 ± 4.8
LVEF (%)	65.6 ± 5.4
Procedure Parameters
Balloon type, 28-mm /23-mm/double	34 (56.7) / 24(40) / 2(3.3)
Nº. of freeze	10.8 ± 3.2
Acute PVI
Patient level <a href="#TFN2">*</a>	60(100)
With CB only, PV level<sup><a href="#TFN3">#</a></sup>	225 (94.5)
With CB only, patient level	51(85)
Complications	4 (6.7)
Phrenic nerve palsy	1 (1.7)
Pericardial & pleural effusion	1 (1.7)
Left groin hematomas	2 (3.3)
