# Supplementary material
Source: publisher figshare collection journal article supplement (https://scielo.figshare.com/articles/dataset/_/6503222)
Supplement: Supplementary file 2 [file Table_2.xls]

## Sheet: Table_2
<b>PV location</b>	<b>D<sub>long</sub> (mm)</b>			<b>D<sub>short</sub> (mm)</b>			<b>D<sub>corrected</sub> (mm)</b>
	23-mm CB	28-mm CB	p	23-mm CB	28-mm CB	p	23-mm CB	28-mm CB	p
LSPV	20.3 ± 3.0	21.7 ± 2.8	0.06	13.5 ± 2.7	15.2 ± 3.3	.04	17.7 ± 2.7	19.3 ± 2.5	0.02
LIPV	17.4 ± 3.4	17.6 ± 2.1	0.80	11.7 ± 3.3	12.9 ± 2.1	.13	15.3 ± 3.2	15.9 ± 1.9	0.41
RIPV	18.3 ± 3.0	19.6 ± 3.0	0.09	15.6 ± 2.9	17.1 ± 3.0	.054	17.3 ± 2.6	18.8 ± 2.7	0.046
RSPV	21.2 ± 3.0	24.3 ± 3.4	0.001	18.0 ± 3.7	20.4 ± 3.8	.02	20.0 ± 3.0	22.7 ± 3.4	0.01
Total	19.2 ± 3.4	20.8 ± 3.8	0.001	14.6 ± 3.9	16.4 ± 4.1	.001	17.6 ± 3.3	19.1 ± 3.6	0.001
