# Supplementary material
Source: publisher figshare collection journal article supplement (https://scielo.figshare.com/articles/dataset/_/6503222)
Supplement: Supplementary file 3 [file Table_3.xls]

## Sheet: Table_3
<b>Location</b>	<b>typical</b>	<b>with common trunk</b>	<b>with common antrum</b>	<b>with ostial branch</b>	<b>with supernumerary vein (MPV)</b>
LSPV	23(38.3)	11(18.3)	25(41.7)	2(3.3)	0
LIPV	23(38.3)	11(18.3)	25(41.7)	3(5.0)	0
RIPV	24(40)	0	6(10)	27(45)	4(6.7)
RSPV	37(61.7)	0	6(10)	14(23.3)	4(6.7)
Total	107(44.6)	22(9.2)	62(25.8)	46(19.2)	8(3.3)
