# Supplementary material
Source: publisher figshare collection journal article supplement (https://scielo.figshare.com/articles/dataset/_/6503222)
Supplement: Supplementary file 4 [file Table_4.xls]

## Sheet: Table_4
<b>PV location</b>	<b>BFT (s)</b>			<b>BNT (ºC)</b>			<b>BWT (s)</b>
	23-mm CB	28-mm CB	p	23-mm CB	28-mm CB	p	23-mm CB	28-mm CB	p
LSPV	13.7 ± 4.2	23.8 ± 9.1	< 0.001	-52.8 ± 6.5	-46.8 ± 7.1	< 0.001	19.8 ± 7.7	25.3 ± 11.0	0.001
LIPV	14.5 ± 3.4	27.3 ± 7.8	< 0.001	-50.2 ± 4.9	-42.0 ± 4.8	< 0.001	17.5 ± 5.7	17.9 ± 5.9	0.656
RIPV	13.9 ± 4.0	28.1 ± 8.9	< 0.001	-52.6 ± 5.9	-42.3 ± 6.9	< 0.001	20.0 ± 7.6	18.4 ± 8.4	0.237
RSPV	12.1 ± 3.0	21.3 ± 7.6	< 0.001	-56.8 ± 5.1	-49.7 ± 6.7	< 0.001	26.0 ± 6.8	30.4 ± 11.5	0.008
Total	13.6 ± 3.8	25.2 ± 8.8	< 0.001	-53.1 ± 6.1	-45.1 ± 7.1	< 0.001	20.8 ± 7.6	22.7 ± 10.6	0.014
